# Supplementary material
Source: Springer Nature journal article supplement (https://www.springermedizin.de/resource/supplementary/13019_2010_250_MOESM6_ESM.pdf/9638222)

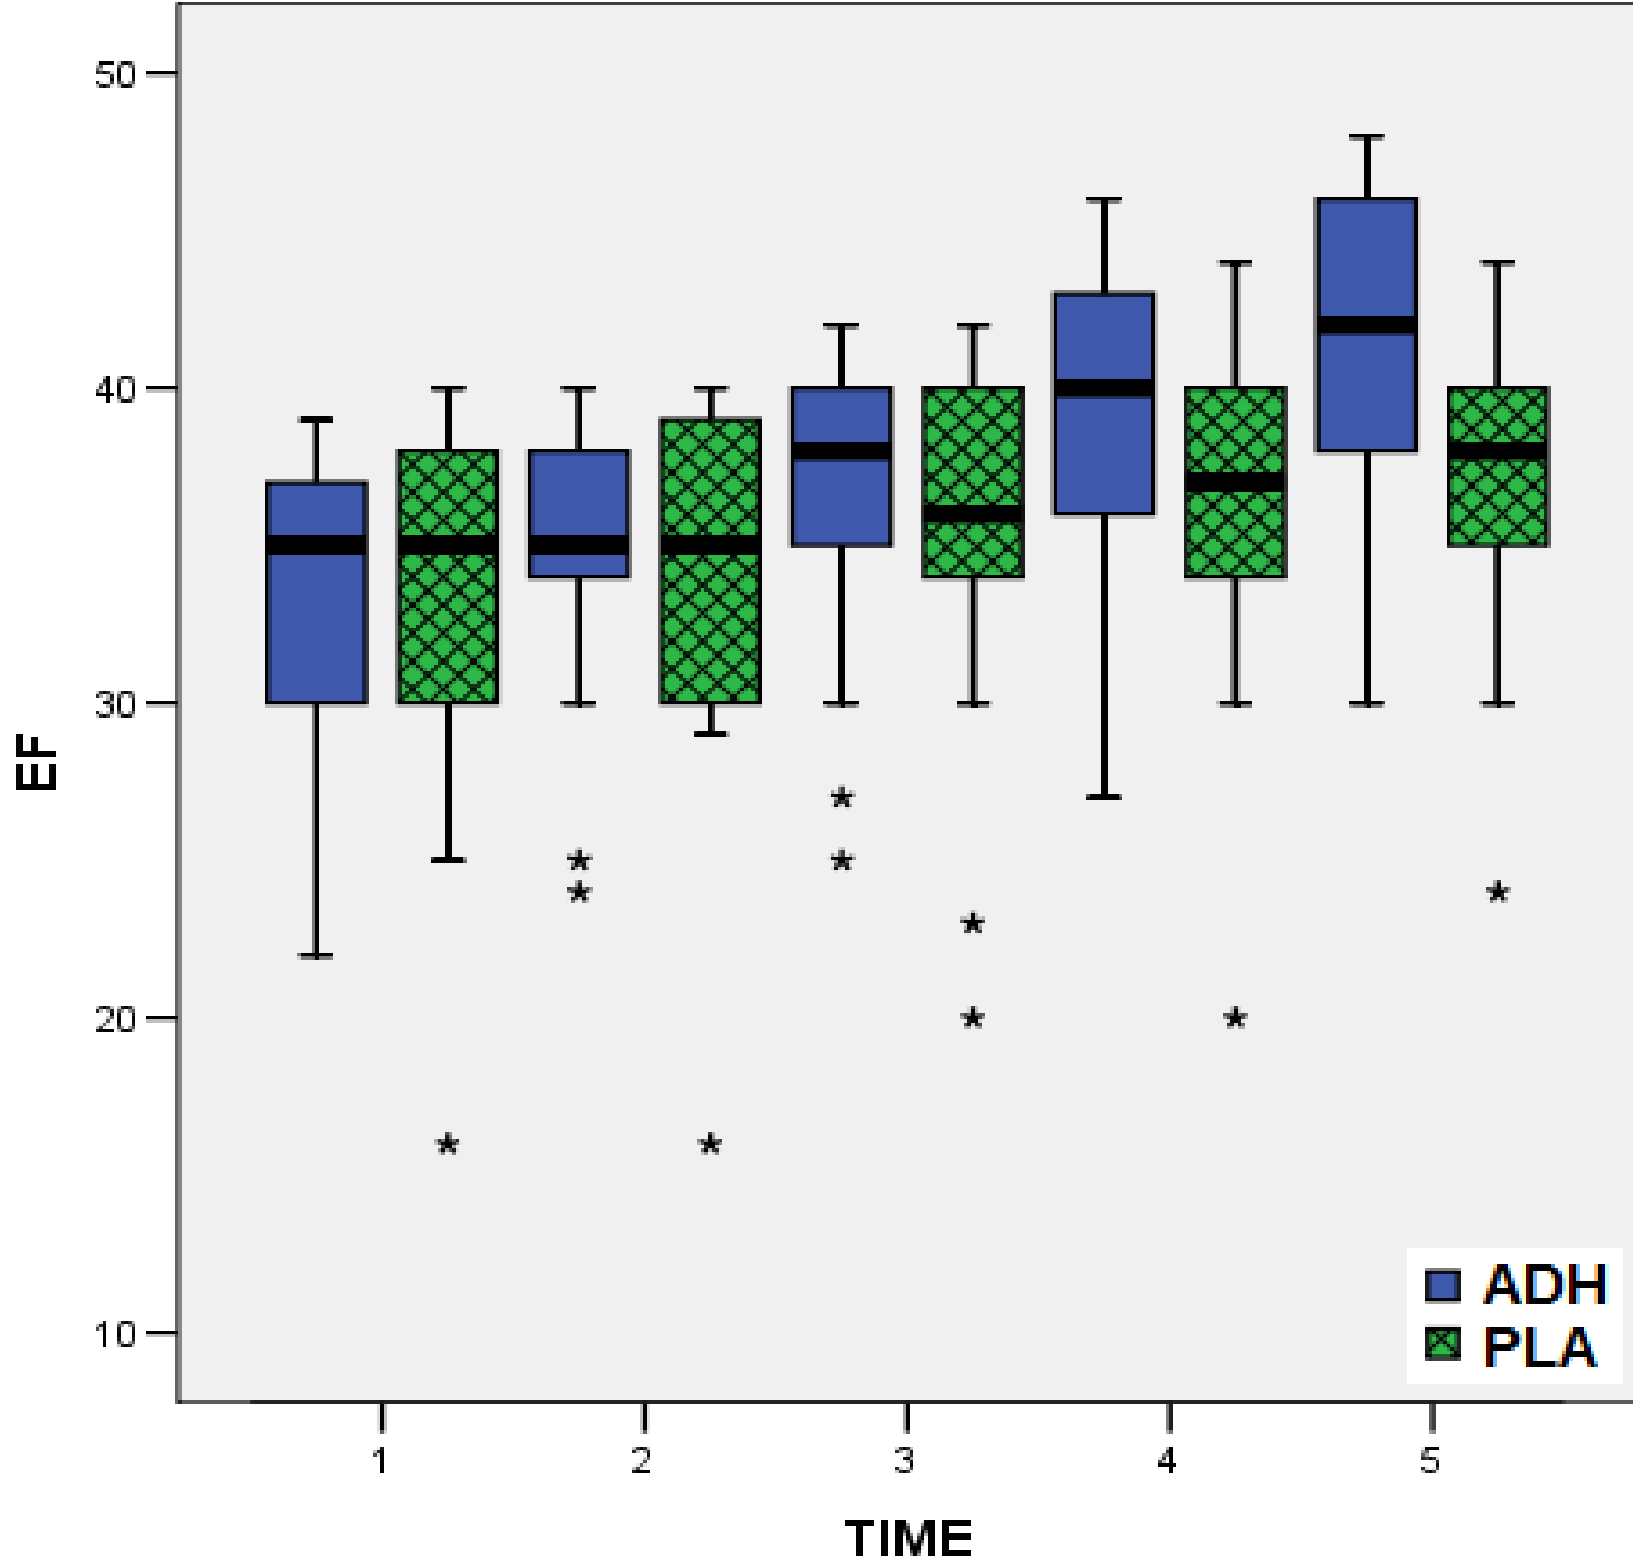

Supplement: MOESM6 [file 9638222]
